1 **Urbanization impacts apex predator gene flow**

2 **but not genetic diversity across an urban-rural divide**

3  
4 Trumbo DR<sup>1</sup>, Salerno PE<sup>1</sup>, Logan KA<sup>2</sup>, Alldredge M<sup>3</sup>, Gagne RB<sup>4</sup>, Kozakiewicz CP<sup>5</sup>, Kraberger S<sup>4</sup>,  
5 Fountain-Jones N<sup>6</sup>, Craft ME<sup>6</sup>, Carver S<sup>5</sup>, Ernest HB<sup>7</sup>, Crooks K<sup>8</sup>, VandeWoude S<sup>4</sup>, Funk WC<sup>1,9</sup>

6  
7 <sup>1</sup>Department of Biology, Colorado State University, Fort Collins, CO 80523 USA

8 <sup>2</sup>Colorado Parks and Wildlife, Montrose, CO 81401 USA

9 <sup>3</sup>Colorado Parks and Wildlife, Fort Collins, CO 80526 USA

10 <sup>4</sup>Department of Microbiology, Immunology, and Pathology, Colorado State University, Fort Collins, CO  
11 80523 USA

12 <sup>5</sup>Department of Biological Sciences, University of Tasmania, Hobart, TAS 7005 Australia

13 <sup>6</sup>Department of Veterinary Population Medicine, University of Minnesota, Saint Paul, MN 55108 USA

14 <sup>7</sup>Department of Veterinary Sciences, University of Wyoming, Laramie, WY 82070 USA

15 <sup>8</sup>Department of Fish, Wildlife, and Conservation Biology, Colorado State University, Fort Collins, CO  
16 80523 USA

17 <sup>9</sup>Graduate Degree Program in Ecology, Colorado State University, Fort Collins, CO 80523 USA

18

19 **Abstract**

20 Apex predators are important indicators of intact natural ecosystems. They are also sensitive to  
21 urbanization because they require broad home ranges and extensive contiguous habitat to support their  
22 prey base. Pumas (*Puma concolor*) can persist near human developed areas, but urbanization may be  
23 detrimental to their movement ecology, population structure, and genetic diversity. To investigate  
24 potential effects of urbanization in population connectivity of pumas, we performed a landscape genomics  
25 study of 134 pumas on the rural Western Slope and more urbanized Front Range of Colorado, USA. Over  
26 12,000 single nucleotide polymorphisms were genotyped using double-digest, restriction site-associated  
27 DNA sequencing (ddRADseq). We investigated patterns of gene flow and genetic diversity, and tested for  
28 correlations between key landscape variables and genetic distance to assess the effects of urbanization and  
29 other landscape factors on gene flow. Levels of genetic diversity were similar for the Western Slope and  
30 Front Range, but effective population sizes were smaller, genetic distances were higher, and there was  
31 more overall population substructure in the more urbanized Front Range. Forest cover was strongly  
32 positively associated with puma gene flow on the Western Slope, while impervious surfaces restricted  
33 gene flow and more open, natural habitats enhanced gene flow on the Front Range. Landscape genomic  
34 analyses revealed differences in puma movement and gene flow patterns in rural versus urban settings.  
35 Our results highlight the utility of dense, genome-scale markers to document subtle impacts of  
36 urbanization on a wide-ranging carnivore living near a large urban center.

37

38 **Keywords:** landscape genomics, gene flow, genetic diversity, effective population size, urbanization,  
39 *Puma concolor*

40

## 41 **Introduction**

42           Urbanization is a major threat to biodiversity, and in particular to apex predators with broad home  
43 ranges (Cohen 2003; Theobald 2005; Crooks *et al.* 2017). Habitat fragmentation due to urbanization can  
44 have important impacts on predator movement, disease, and survival (Markovchick-Nicholls *et al.* 2008;  
45 Carver *et al.* 2016; Fountain-Jones *et al.* 2017). This reduced connectivity can lead to smaller, more  
46 isolated populations, where less gene flow and genetic diversity, as well as smaller effective population  
47 sizes (Riley *et al.* 2006; Vandergast *et al.* 2007; Ernest *et al.* 2014) ultimately cause local and regional  
48 extirpations through environmental and demographic stochasticity and inbreeding depression (Allendorf *et*  
49 *al.* 2013). Moreover, increased human recreational activities in wildlife habitats associated with nearby  
50 urbanization can change wildlife movement patterns and habitat usage, exacerbating the impacts of  
51 fragmentation (McKinney 2002; Lewis *et al.* 2015). As human populations continue to expand worldwide,  
52 urban areas are becoming larger and more extensive on the landscape. However, we do not fully  
53 understand how urbanization affects natural ecosystems near wildland-urban interfaces (Radeloff *et al.*  
54 2005; Magle *et al.* 2012).

55           Large carnivores are important indicators of intact natural ecosystems, as they require an abundant  
56 and sustainable prey base, as well as high habitat connectivity to support their broad home ranges (Sergio  
57 *et al.* 2006, 2008). However, understanding the effects of urbanization on large carnivores is difficult due  
58 to their low population densities and secretive nature (Logan and Sweanor 2001; Riley *et al.* 2006;  
59 Hornocker and Negri 2009). Camera traps, radio-telemetry, and GPS collars provide valuable information  
60 on animal home ranges and population sizes (e.g., Lewis *et al.* 2015; Blecha *et al.* 2018), but these studies  
61 are expensive, time consuming, and can only monitor a small fraction of the total population for limited  
62 time periods. Population and landscape genetics can provide additional, complementary techniques for a  
63 more detailed understanding of wildlife populations (Epps *et al.* 2007; Lowe and Allendorf 2010;  
64 Balkenhol *et al.* 2016). Genetic studies provide an indicator of functional landscape connectivity through  
65 measures of gene flow, effective population sizes of breeding individuals, and cost-efficient monitoring of

66 genetic diversity across broad geographic areas (McRae *et al.* 2005; Solberg *et al.* 2006). Moreover, recent  
67 high-throughput sequencing technologies enable the genotyping of many more thousands of loci than  
68 previously possible, providing higher power to detect the often subtle population genetic structure of wide-  
69 ranging species such as large carnivores (Luikart *et al.* 2003; Holderegger *et al.* 2006).

70 Pumas (*Puma concolor*; other common names include mountain lions, cougars, panthers,  
71 catamounts) are a large, apex predator with one of the broadest latitudinal ranges of any terrestrial  
72 carnivore, spanning western North America, Central America, and South America (Hornocker and Negri  
73 2009). Pumas are sensitive to urbanization, requiring broad-scale landscape connectivity to persist, and are  
74 thus useful indicators for monitoring the effects of urban fragmentation (Beier 1995; Crooks 2002;  
75 Maletzke *et al.* 2017). Given sufficient habitat area and landscape connectivity, however, pumas can still  
76 persist within and adjacent to urban systems (Wilmers *et al.* 2013; Riley *et al.* 2014; Lewis *et al.* 2015;  
77 Zeller *et al.* 2017; Blecha *et al.* 2018). Furthermore, the substantial area requirements of large carnivores  
78 such as pumas can enhance their role as “umbrella” species, whose protection also benefits co-occurring  
79 species through broad-scale habitat preservation (Thorne *et al.* 2006).

80 The southern Rocky Mountains in western Colorado, USA support natural habitats with high  
81 puma densities, as well as many rural and urban human developments (Hornocker and Negri 2009). The  
82 Western Slope of the Rocky Mountains primarily consists of large areas of contiguous public wildlands  
83 with an abundant prey base for pumas, interspersed with small rural and exurban developments, including  
84 the Uncompahgre Plateau region near the town of Montrose (Western Slope Study Area; Figure 1). In  
85 contrast, the Front Range is a rapidly urbanizing, major metropolitan area on the Eastern Slope of the  
86 Continental Divide, where urbanization is spreading from lower elevation areas in and around the Denver  
87 Metropolitan Area into adjacent wildland habitats in the foothills of the Rocky Mountains. Pumas continue  
88 to persist near this wildland-urban interface, including adjacent to the city of Boulder on the western edge  
89 of the Denver Metropolitan Area (Front Range Study Area; Figure 1; Lewis *et al.* 2015; Moss *et al.*  
90 2016a). From 2010 – 2017, Colorado was the 8th fastest growing U.S. state by population (577,829

91 residents added) and the 6th fastest by percentage (11.5% population growth; U.S. Census Bureau 2017),  
92 with most of this growth occurring along the eastern edge of the Front Range. Thus, comparative studies  
93 of puma movement and gene flow in one of the most populous states in the mid-continent USA, which  
94 also supports a robust puma population, can provide insight into the effects of urbanization on this  
95 important apex predator.

96 Here, we tested how different landscape factors, including urbanization, enhance or restrict gene  
97 flow and genetic diversity in a large apex predator across an urban-rural divide in Colorado, USA. A large  
98 sample (n = 134) of pumas were utilized from (a) the rural Western Slope and (b) the more urbanized  
99 Front Range (Figure 1). We used double digest restriction site associated DNA sequencing (ddRADseq) to  
100 genotype pumas at 12,444 single nucleotide polymorphism (SNP) loci to evaluate the potential differences  
101 in gene flow, effective population sizes, genetic diversity, and population structure in these two different  
102 landscapes. We tested landscape genomic hypotheses by correlating key landscape factors with puma  
103 genetic distance measures. We hypothesized that pumas in the more urbanized Front Range would have  
104 (a) smaller effective population sizes, (b) lower levels of genetic diversity, and (c) more landscape factors  
105 related to urbanization that restrict gene flow, relative to the rural Western Slope landscape.

106

## 107 **Materials and Methods**

### 108 *Samples and sequences*

109 Puma blood and tissue samples were collected as part of ongoing monitoring efforts by Colorado  
110 Parks and Wildlife in both the Western Slope and Front Range regions of the southern Rocky Mountains  
111 of Colorado, USA (Figure 1; Lewis *et al.* 2015; Carver *et al.* 2016). Samples were collected from 2005-  
112 2014 on the Western Slope and 2007-2013 on the Front Range. Western Slope samples consisted of 36  
113 males and 42 females, and Front Range samples consisted of 24 males, 31 females, and 1 puma of  
114 unknown sex. Our sampling represents a large proportion of the resident pumas present in both regions  
115 during the sampling period, as Lewis *et al.* (2015) estimated 14.4 (S.E. 1.6) and 14.7 (S.E. 1.3) resident

116 pumas occupying the Western Slope and Front Range study areas at a single time point, respectively, from  
117 motion camera and telemetry data collected in 2009 and 2010.

118 Genomic DNA was extracted from tissue or blood using QIAGEN DNeasy Blood & Tissue kits  
119 (QIAGEN Inc., Valencia, CA). We genotyped a total of 78 individuals from the Western Slope and 56  
120 individuals from the Front Range using the ddRADseq protocol described in Peterson *et al.* (2012) and  
121 sequenced on Illumina HiSeq 2500 and 4000 machines (Illumina, San Diego, California) using 100bp  
122 single-end sequencing at the University of Oregon Genomics Facility ([gc3f.uoregon.edu](http://gc3f.uoregon.edu)). We tested 9  
123 different combinations of restriction enzymes on puma samples for digestion efficiency and evaluated the  
124 size ranges of fragment distributions using an Agilent Tapestation 2200 (Agilent Genomics, Santa Clara,  
125 California). We chose the digest enzymes EcoRI-HF (6bp recognition) and NlaIII (4bp recognition) and a  
126 target fragment size range of 300–400 bp (excluding adapters). We used a Blue Pippin with a 2%, internal  
127 standard, 100-600 bp gel cartridge (Sage Science, Beverly, Massachusetts) for size selection and a  
128 biotinylated P2 adapter with DynaBeads<sup>®</sup> (Peterson *et al.* 2012) to purify the polymerase chain reaction  
129 (PCR) template for the final enrichment. PCR was performed for 12 cycles and five reactions were tested  
130 for each pool of individuals. We initially genotyped 16 individuals multiplexed into an Illumina 2500  
131 HiSeq lane to estimate maximum multiplexing based on a target of >12X coverage per locus. After  
132 assessment of locus coverage, we proceeded to multiplex 48 and 70 individually-barcoded samples on  
133 Illumina 2500 and 4000 HiSeq lanes, respectively, using the Peterson *et al.* (2012) flex adaptors.

134

### 135 *Bioinformatics pipeline and filters*

136 We evaluated read quality for each sequencing lane using FastQC  
137 ([bioinformatics.babraham.ac.uk](http://bioinformatics.babraham.ac.uk)) and assembled our SNP dataset *de novo* using Stacks v 1.41 (Catchen *et al.*  
138 *al.* 2013). Details on Stacks code and parameter settings used are on the GitHub repository;  
139 [github.com/pesalerno/PUMAGenomics](https://github.com/pesalerno/PUMAGenomics). We demultiplexed and filtered sequencing reads using the  
140 program *process\_radtags* in Stacks. Due to sensitivity of downstream genotyping with different Stacks

141 parameter settings (Mastretta-Yanes *et al.* 2015; Paris *et al.* 2017), we incorporated individual sample  
142 replicates in library preparations. In each library, we included 3 within and 3 between library replicates,  
143 which were used for estimating genotyping error rates for different combinations of parameters used to  
144 construct loci with the *denovo\_map.pl* Stacks pipeline. We ran 11 different *de novo* assemblies varying 4  
145 different Stacks parameters that affect locus, allele, and SNP error rates and the number of loci genotyped,  
146 consisting of (1) minimum number of identical, raw reads required to create a stack (-m), (2) number of  
147 mismatches allowed between loci when processing a single individual (-M), (3) number of mismatches  
148 allowed between loci when building the catalog (-n), and (4) maximum number of stacks at a single de  
149 novo locus (-max\_locus\_stacks) (Table S1; Mastretta-Yanes *et al.* 2015). Locus error rate was calculated  
150 as the number of loci present in only one of the samples of a replicate pair divided by the total number of  
151 loci, allele error rate was the number of allele mismatches between replicate pairs divided by the number  
152 of loci, and SNP error rate was the proportion of SNP mismatches between replicate pairs.

153         After identifying the most supported parameter settings that minimized locus, allele, and SNP  
154 error rates, while maximizing the number of SNPs (-m = 3, -M = 4, -n = 4, max\_locus\_stacks = 3; Table  
155 S1), we exported the SNP matrix with the *populations* program in Stacks (Catchen *et al.* 2013), retaining  
156 SNPs that were present in at least 20% of individuals by population, and retaining a single random SNP  
157 per locus. This matrix was further filtered for missing data in Plink v. 1.07, first by locus, then by  
158 individual, and then by minor allele frequency (MAF) using multiple combinations of thresholds for  
159 reducing missing data in the matrix (see [github.com/pesalerno/PUMAGenomics](https://github.com/pesalerno/PUMAGenomics)). After evaluating missing  
160 data from SNP matrices, we retained the matrix with a more stringent locus filter (excluding loci missing  
161 >25% individuals) and a less stringent filter on minor allele frequency (excluding loci with MAF < 0.01).  
162 We additionally filtered loci that were found at position 95 (the last position of our reads) due to a higher  
163 number of SNPs present in this position, suggesting increased error rates due to low sequence quality  
164 towards the end of the sequencing read. In order to compare landscape resistances with putatively neutral  
165 loci, we used a Principal Components Analysis (PCA) to identify loci showing strong signatures of

166 selection relative to neutral background genomic variation with the program PCAdapt (Luu *et al.* 2016).  
167 We found twelve, putatively adaptive, outlier loci using a false discovery rate of 10%, so we filtered these  
168 outliers out for downstream landscape genomic analyses to avoid confounding neutral demographic  
169 patterns with patterns generated by loci under selection.

170

### 171 *Population genomics and structure*

172 Population genomic statistics were calculated for the two sampling regions, the Western Slope and  
173 Front Range (Figure 1). Observed and expected heterozygosity ( $H_{\text{obs}}$  and  $H_{\text{exp}}$ ), nucleotide diversity ( $\pi$ ),  
174 inbreeding coefficient ( $F_{\text{IS}}$ ), and population genetic differentiation ( $F_{\text{ST}}$ ) were calculated using the  
175 *populations* program in Stacks with SNP loci that passed previous filters, excluding a single individual  
176 (sample\_1382) that did not pass the 75% missing data threshold. We estimated allelic richness ( $A_r$ ) using  
177 HP-RARE 1.0 (Kalinowski 2005), which corrects for variance in sample sizes using rarefaction. Two  
178 complementary, individual-based genetic distances were calculated: proportion of shared alleles distance  
179 ( $D_{\text{ps}}$ ; Bowcok *et al.* 1994) using the adegenet R v. 3.3.3 package and relatedness distance ( $r$ ; Smouse and  
180 Peakall 1999) using the PopGenReport R package. We then calculated mean genetic distance among  
181 individuals for each region, corrected for geographic distance (i.e., genetic distance per km), since  
182 individuals that are farther apart are expected to have higher genetic distances due to neutral isolation by  
183 distance population processes (Wright 1942; Balkenhol *et al.* 2016). Effective population sizes ( $N_e$ ) were  
184 estimated using the linkage disequilibrium method in NeEstimator v. 2.01 (Do *et al.* 2014), using the  
185 correction for chromosome number (Waples *et al.* 2016), which has been shown to be a robust method for  
186 inferring  $N_e$  using SNP datasets and large sample sizes (Waples 2016; Waples *et al.* 2016). We evaluated  
187 overall genetic structure as well as genetic differentiation among the two sampling sites (Western Slope  
188 and Front Range) using PCA and Discriminant Analysis of Principal Components (DAPC) in the R  
189 package adegenet (Jombart 2008) and Admixture ancestry analysis (Alexander *et al.* 2009). We used the  
190 function assignplot to identify individuals that were putative migrants or admixed based on the individual



191 DAPC assignment probabilities. We used the `find.clusters` command in `adegenet` and minimized cross  
192 validation error in `Admixture` to estimate the number of populations (i.e.,  $K$ ).

193

#### 194 *Landscape genomics*

195 Geographic Information Systems (GIS) data were collected for different landscape factors that we  
196 hypothesized would affect puma dispersal and gene flow in Colorado. Table 1 provides details on GIS  
197 data sources, spatial resolution, and ecological justification for each landscape factor. Study area extents  
198 were calculated and landscape variables were compared across regions by buffering individual data points  
199 by a typical female puma dispersal distance of 34.6 km (Logan and Sweanor 2001), dissolving  
200 overlapping buffers, and calculating zonal statistics within each region (Western Slope and Front Range)  
201 using ArcGIS v. 10.1 (ESRI, Redlands, California). Landscape data were converted into resistance  
202 surfaces using the `Reclassify` and `Raster Calculator` tools in ArcGIS. The following hypothesized  
203 relationships of landscape factors with puma gene flow were modeled: percent impervious surface cover  
204 (negative effect on gene flow), land cover (forested, open-natural, and developed: positive, neutral, and  
205 negative effects on gene flow, respectively), percent tree canopy cover (positive effect), vegetation density  
206 (positive effect), river and stream riparian corridors (positive effect), roads (negative effect), minimum  
207 temperature of the coldest month (negative effect), annual precipitation (positive effect), topographic  
208 roughness (positive effect), and elevation (negative effect). Additionally, we included an isolation by  
209 geographic distance model, which would be supported if none of the landscape variables had an effect on  
210 gene flow except for straight line, Euclidean distance between individuals (Wright 1942; Balkenhol *et al.*  
211 2016). Table S2 describes methods and justification for converting raw landscape variables to resistance  
212 surfaces.

213 Two genetic distance measures were used as response variables in landscape genomic analyses:  
214 proportion of shared alleles distance ( $D_{ps}$ ; Bowcok *et al.* 1994) and relatedness distance ( $r$ ; Smouse and  
215 Peakall 1999). Environmental resistances among individuals were calculated using `Circuitscape` (McRae

216 2006) for each landscape resistance surface (McRae 2006; Row *et al.* 2017). Circuitscape resistances are a  
217 useful tool in landscape genetics because they summarize all potential movement pathways  
218 simultaneously, as opposed to least cost paths that evaluate only a single idealized pathway, and thus  
219 assume the study organism has complete knowledge of the landscape and always chooses the ideal  
220 pathway (McRae 2006; Balkenhol *et al.* 2015). Landscape variables were tested for multicollinearity, both  
221 prior to and after calculating environmental resistances in Circuitscape, to ensure Pearson's  $r$  correlations  
222  $< 0.7$  and variance inflation factor (VIF) scores  $< 5$  in final landscape genomics models, as collinearity can  
223 cause instability in parameter estimation in regression models (Tables S3 and S4; Warren *et al.* 2010;  
224 Dormann *et al.* 2012; Rowe *et al.* 2017).

225 Two complementary methods were used to estimate the effects of environmental resistances on  
226 genetic distances: multiple regression on distance matrices (MRDM; Legendre *et al.* 1994) using  
227 PERMUTE v.3.4 and maximum likelihood of population effects (MLPE; Clark *et al.* 2002; van Strien *et*  
228 *al.* 2012; Row *et al.* 2017) using the lme4 R package. MRDM is a permutational, distance matrix-based  
229 approach that has been traditionally used in landscape genetic analyses, whereas MLPE is a newer linear  
230 mixed effects modeling technique that models pairwise comparisons as a random effect and environmental  
231 resistances as fixed effects (Balkenhol *et al.* 2016). Recent evaluations of landscape genetic approaches  
232 found linear mixed effects modeling using MLPE to be more accurate, although both approaches  
233 performed well (Shirk *et al.* 2017). Therefore, we included the traditional MRDM approach as well as  
234 MLPE in order to utilize multiple, complementary techniques for inferring associations between landscape  
235 features and gene flow. For MRDM and MLPE, genetic distances were the response variable and  
236 environmental resistances were explanatory variables. Additionally for MLPE, a random effect matrix of  
237 individual comparisons was included to control for the non-independent, pairwise structure of the data,  
238 and landscape resistances were standardized to units of standard deviation centered on the mean (van  
239 Strien *et al.* 2012; Row *et al.* 2017). Models were ranked using the Bayesian information criterion (BIC),  
240 and top models within 5 BIC units are reported (Richards 2015).

241

## 242 **Results**

### 243 *Genotyping and filtering SNP matrices*

244 Initial Stacks processing retained a single random SNP per 95 bp read and SNPs present in at least  
245 20% of individuals by population, resulting in a matrix of 98,813 SNPs. These SNPs were further filtered  
246 in Plink by removing loci that were present in less than 75% of individuals, which resulted in a matrix of  
247 20,355 SNPs. Only a single individual was excluded based on our >75% missing loci per individual  
248 threshold. After excluding SNPs present in the 95<sup>th</sup> sequencing base position and with minor allele  
249 frequency <0.01, we retained 12,456 SNPs. PCAdapt detected twelve outlier loci, putatively under  
250 selection, while accounting for population structure (K=2). After removing these putatively adaptive loci,  
251 the final neutral dataset contained 12,444 SNPs (Table S1; [github.com/pesalerno/PUMAGenomics](https://github.com/pesalerno/PUMAGenomics)).

252

### 253 *Population genomics and structure*

254 The two study areas encompass similar geographic extents: 11,889 km<sup>2</sup> for the Western Slope and  
255 11,958 km<sup>2</sup> for the Front Range (Table 2). Measures of genetic diversity ( $H_{obs}$ ,  $H_{exp}$ ,  $\pi$ ,  $A_r$ ) and inbreeding  
256 ( $F_{IS}$ ) were similar for the Western Slope and Front Range (Table 2). However, the effective population  
257 size ( $N_e$ ) was smaller, mean genetic distances among individuals ( $D_{PS}/km$  and  $r/km$ ) were higher, and there  
258 was more overall population substructure in the more urbanized Front Range (Table 2, Figure 2). We also  
259 calculated  $N_e$  using subsets of individuals (i.e., pre and post-2010 individuals in the Front Range, pre and  
260 post-2011 individuals in the Western Slope), since multiple overlapping generations may bias effective  
261 population size estimates low or high (Waples 2016; Waples et al. 2016).  $N_e$  remained consistently higher  
262 in the Western Slope, although it differed between the earlier and later sampling periods there, and  
263 indicated the population may be expanding (Table S5). We found a detectable signature of population  
264 differentiation between the Western Slope and Front Range regions based on a PCA and DAPC, and  
265 Admixture ancestry analysis indicated K=2 was the best supported value of K by minimizing cross

266 validation error (Figure 2; Alexander *et al.* 2009). The proportion of correct individual assignment to  
267 populations based on DAPC (Figure 2b), which attempts to minimize within population distances and  
268 maximize between population distances (Jombart 2008), was high for most individuals in both the  
269 Western Slope (0.98) and the Front Range (0.96). However, the DAPC assignplot also identified admixed  
270 individuals and putative migrants between regions, including a female and a male in the Front Range that  
271 assigned mostly to the Western Slope, and an admixed male in the Western Slope that assigned mostly to  
272 the Front Range (Figure 2b). We also analyzed both regions separately for population substructure (Figure  
273 S1), and there was no signature of population differentiation within the Western Slope or Front Range,  
274 further supporting two populations.

275

## 276 *Landscape Genomics*

277 The Front Range has more urban development than the Western Slope, with more impervious  
278 surface cover and a higher density of roads (Figure 1, Table 3, Table S2). The Front Range also has more  
279 tree canopy cover, higher vegetation density, and higher annual precipitation than the Western Slope  
280 (Table 3), likely due to the high desert habitats (i.e., the Colorado Plateau ecoregion) in the Western Slope  
281 being drier than the grassland and shrub habitats found at lower elevations of the Front Range (i.e., the  
282 Great Plains ecoregion; McMahon *et al.* 2001).

283 Prior to running Circuitscape, landscape raster surfaces were largely uncorrelated (i.e., Pearson's  $r$   
284  $< 0.7$ ), with the exception of elevation, which was positively correlated with annual precipitation and  
285 negatively correlated with minimum temperature of the coldest month in both regions, and vegetation  
286 density, which was negatively correlated with annual precipitation in the Front Range (Table S3). After  
287 Circuitscape analyses, environmental resistance variables showed more collinear relationships than raw  
288 raster surfaces (Table S4), likely due to Circuitscape resistances being higher for individuals separated by  
289 larger geographic distances (McRae 2006). Therefore, we removed landscape variables from both regions  
290 that were strongly correlated with many other variables, until all VIF scores were less than 10 (Row *et al.*

291 2017). Variables retained were geographic distance, river and stream riparian corridors, roads, impervious  
292 surface cover, tree canopy cover, vegetation density, and minimum temperature of the coldest month.  
293 However, vegetation density was still correlated with geographic distance in both regions, and impervious  
294 surface was correlated with geographic distance and tree canopy cover in the Western Slope (Table S4).  
295 We removed these variables as well, resulting in Pearson's  $r$  correlations less than 0.7 and VIF scores less  
296 than or equal to 4.1 and 3.5 in the Western Slope and Front Range, respectively, for all explanatory  
297 variables. Thus final MRDM and MLPE models for the Western Slope included geographic distance, tree  
298 canopy cover, stream and river riparian corridors, roads, and minimum temperature of the coldest month;  
299 and for the Front Range included the same landscape variables plus impervious surface cover.

300 Landscape genomic patterns of pumas were different in the rural Western Slope compared to the  
301 more urbanized Front Range, with the exception of geographic distance being supported in both regions  
302 (Tables 4 and 5). In the Western Slope, tree canopy cover was consistently positively correlated with gene  
303 flow in MRDM and MLPE models, and low minimum temperatures of the coldest month (i.e., those found  
304 in high elevation, alpine tundra habitats) were negatively correlated gene flow in one MLPE model  
305 (Tables 4 and 5). In contrast, in the Front Range, tree canopy cover and percent impervious surface cover  
306 were negatively associated with gene flow in the top MLPE models (Table 5). Since the relationship  
307 between tree cover and gene flow was the opposite of what we hypothesized in the Front Range, we also  
308 inverted the tree cover resistance surface (i.e., making higher tree cover = higher resistance), reran  
309 Circuitscape and MLPE analyses, and higher tree cover still showed significant negative correlations with  
310 gene flow in this region.

311

## 312 **Discussion**

313 The apex predator puma (*Puma concolor*) persists in many urbanized regions throughout its range,  
314 yet the localized effects of recent urban sprawl remain unclear. Here, we compared patterns of genomic  
315 landscape connectivity and diversity of pumas across two regions that span an urban-rural divide in

316 Colorado, USA. Landscape genomic connectivity patterns differed between regions, such that genetic  
317 distances were higher and urbanization (i.e., percent impervious surface cover) restricted gene flow in the  
318 more urbanized Front Range, whereas forest cover was most important for enhancing gene flow on the  
319 rural Western Slope. Despite finding reductions in gene flow associated with urbanization on the Front  
320 Range, population-level genetic diversity and inbreeding measures were similar to those on the rural  
321 Western Slope. This suggests that recent urban sprawl in the Colorado Front Range has not yet had a  
322 substantial impact on the genetic diversity of pumas. This is in contrast to more isolated puma populations  
323 in other highly urbanized landscapes such as southern California and Florida, which exhibit reduced  
324 genetic diversity and strong evidence of inbreeding compared to Colorado pumas (Ernest *et al.* 2003,  
325 2014; Johnson *et al.* 2010). However, a smaller effective population size, higher among-individual genetic  
326 distances, and higher population substructure in the recently urbanized Front Range suggest habitat  
327 fragmentation has already impacted this population and could cause further reductions of genetic diversity  
328 as urbanization continues to expand in Colorado (Theobald 2005; U.S. Census Bureau 2017). If puma  
329 populations decline, this could have important cascading effects into lower trophic levels, such as  
330 overgrazing of vegetation by ungulate herbivores (Markovchik-Nicholls *et al.* 2008).

331

### 332 *Population genomics and structure*

333 The Western Slope and Front Range were resolved as two genetically distinct groups (i.e.,  $K=2$ ;  
334 Figures 1 and 2). Minimum temperature of the coldest month was also negatively associated with gene  
335 flow in one of the top landscape genomic models on the Western Slope (Table 5), suggesting there may be  
336 restricted gene flow through high elevation, alpine tundra habitats (McMahon *et al.* 2001). However,  
337 potential immigrants and admixed individuals were identified moving in both directions (Figure 2) and  
338 overall genetic differentiation between the two populations was low (pairwise  $F_{ST} = 0.02$ ; Table 2). Since  
339 our sample archive consisted of opportunistically collected samples, our analyses were restricted to  
340 populations in two distinct regions, whereas pumas occur throughout the southern Rocky Mountains in

341 Colorado. Therefore, potential immigrants and admixed individuals are not necessarily moving between  
342 our specific Western Slope and Front Range study areas, but may originate from other unsampled  
343 populations that share genetic ancestry with our two study regions. Nevertheless, results from our study  
344 suggest pumas may be somewhat limited in dispersing across the high elevation peaks of the Continental  
345 Divide, and future studies should attempt to sample more intensively across the entire region to further  
346 investigate this trend.

347 We identified similar levels of genetic diversity and inbreeding between the rural Western Slope  
348 and more urbanized Front Range (Table 2), suggesting urbanization is not yet having a large impact on the  
349 genetic diversity of pumas in Colorado. One potential explanation is that urbanization in the Front Range  
350 is primarily occurring on the eastern edge of the region, possibly creating a relatively impermeable urban  
351 boundary on the eastern border, but not isolating pumas in fragments or limiting their connectivity to  
352 wildland habitat to the west (Figure 1; Lewis *et al.* 2015; Blecha *et al.* 2018). Another possibility is that  
353 many of the SNPs we sampled may not have high enough mutation rates to show a strong genomic  
354 signature of the relatively recent effects of rapid urbanization occurring in the Front Range (Haasl and  
355 Payseur 2011; Allendorf *et al.* 2013). As the human population continues to expand, future urbanization  
356 could result in more fragmented populations and reductions in genetic diversity, as has been detected in  
357 other more urbanized landscapes like southern California and Florida (Ernest *et al.* 2003, 2014; Johnson *et*  
358 *al.* 2010).

359 Despite similar geographic extents and levels of genetic diversity in the Western Slope and Front  
360 Range, mean genetic distances among individuals were higher in the urban Front Range (Table 2),  
361 suggesting that fragmentation due to urbanization may be limiting puma dispersal and gene flow. In  
362 addition, a larger effective population size ( $N_e$ ) of pumas was detected on the rural Western Slope  
363 ( $N_e=69.3$ ) compared to the urban Front Range ( $N_e=40.2$ ; Table 2), with the caveat that some assumptions  
364 of this estimator are violated in both regions (e.g., closed populations with no immigration, non-  
365 overlapping generations). The effect of non-overlapping generations on  $N_e$  is difficult to predict (Waples *et*

366 *al.* 2016), and this assumption is expected to be violated similarly in both the Western Slope and Front  
367 Range populations. Immigration, however, is expected to downwardly bias  $N_e$  by creating linkage  
368 disequilibrium through a multi-locus Wahlund effect (Wahlund 1928; Waples and England 2011). Thus, it  
369 is possible that the Front Range may be showing a lower  $N_e$  due to having more immigrants from outside  
370 populations than the Western Slope. This is possible, and perhaps likely, given the higher overall  
371 population substructure in the Front Range (Figure 2), which could indicate more potential immigrants  
372 into this region. On the other hand, if immigration rates are similar for both regions, the relatively smaller  
373 Front Range  $N_e$  may be due to (1) urbanization and fragmentation impacting and limiting population size,  
374 and/or (2) species range limit theory (Abundant Center Hypothesis) predicting that smaller population  
375 sizes are likely to occur at the edge of the geographic range relative to core areas (Brown 1984; Sagarin  
376 and Gaines 2002). These potential underlying factors are not mutually exclusive and may both be acting  
377 together. However, the lack of difference in most genetic diversity measures, in addition to slightly lower  
378 allelic richness in the Front Range, which is the most sensitive metric to recent bottlenecks (Allendorf *et*  
379 *al.* 2013), suggests lower effective population size on the Front Range may be more consistent with recent  
380 urbanization impacts than historical range boundary effects.

381

### 382 *Landscape genomics*

383 With regard to general landscape genomics methodology, we found MRDM to be a much more  
384 conservative approach that adds fewer explanatory variables to the models than MLPE (Tables 4 and 5).  
385 Conversely, MLPE results in more complex models with more explanatory variables and higher  $r^2$  values  
386 (genetic variation explained) than MRDM (Tables 4 and 5). The different genetic distance measures we  
387 used ( $D_{PS}$  and  $r$ ) showed largely consistent relationships with landscape variables, but still provided a few  
388 different insights, particularly using MLPE (Tables 4 and 5). Overall  $r^2$  values were somewhat low ( $r^2 =$   
389 0.04 - 0.08 for MRDM,  $r^2 = 0.11 - 0.17$  for MLPE), but this is expected for a large carnivore with extreme



390 long distance dispersal abilities (e.g., Short Bull *et al.* 2011, Balkenhol *et al.* 2016). Isolation by distance  
391 was important across models for both regions (Tables 4 and 5).

392         On the rural Western Slope, tree canopy cover was most important for enhancing gene flow,  
393 suggesting pumas prefer to disperse through forests rather than more open shrub and grassland habitats in  
394 this landscape (Table 5). Forests provide more cover for concealment and ambush predation (Logan and  
395 Sweanor 2001; Hornocker and Negri 2009; Warren *et al.* 2016). Use of open areas may also increase  
396 susceptibility to mortality by hunters and ranchers (Newby *et al.* 2013), which are both more prevalent in  
397 the rural Western Slope than the more urbanized Front Range. In addition, non-forested areas on the  
398 Western Slope are dry, high elevation desert habitats (i.e., the Colorado Plateau ecoregion; McMahon *et*  
399 *al.* 2001), which may provide less prey and water resources, and thus be poorer habitats for hunting and  
400 dispersal (Sweanor *et al.* 2000; McRae *et al.* 2005; Dickson *et al.* 2013).

401         In the more urbanized Front Range, impervious surface cover restricted gene flow (Table 5). This  
402 suggests urbanization is limiting gene flow, despite high levels of genetic diversity (Table 2). Similarly,  
403 Lewis *et al.* (2015) found pumas were less likely to be detected in habitats with residential development,  
404 even low-density exurban developments, which are increasingly encroaching into the foothills of the Front  
405 Range region. Genetic studies on pumas from more urbanized and fragmented populations in southern  
406 California and Florida have detected strong inbreeding and isolation associated with urbanization (Ernest  
407 *et al.* 2003, 2014; Johnson *et al.* 2010; Riley *et al.* 2014). Our study detected more subtle impacts of  
408 urbanization in a less fragmented landscape, within mountainous wildland habitats adjacent to a major  
409 metropolitan center, which experiences high levels of human outdoor recreation activities such as hiking  
410 and skiing (Figure 1). In addition, in contrast with the rural Western Slope and contrary to our initial  
411 hypotheses, forest cover was negatively associated with gene flow on the Front Range (Table 5). This  
412 pattern suggests pumas are more willing to disperse through open shrub and grassland habitats in this  
413 region. The reasons for this are unclear, but pumas living in the more developed Front Range may be more  
414 acclimated to human activities and thus more willing to travel outside of forested habitats, demonstrating

415 that pumas have a range of adaptable behaviors and will use and move through different types of habitat  
416 (Dickson *et al.* 2005; Blecha *et al.* 2018). Pumas may also be hunting more urban mesopredators,  
417 domestic, and agricultural animals in these open habitats on the more developed Front Range, which was  
418 shown in a prior study using stable isotope analysis of Front Range puma diets (Moss *et al.* 2016b). There  
419 is also less hunting of pumas in the Front Range compared to the rural Western Slope, so pumas may be  
420 less wary of open areas, although this effect would be expected to be counteracted in part by higher traffic  
421 mortality in the more urbanized region (Beier 1995; Crooks 2002).

422

### 423 *Conclusions*

424 Our findings are consistent with prior comparative landscape genetic studies that have revealed  
425 varying effects of landscape factors on movement and gene flow across different portions of a species'  
426 geographic range (e.g., Vandergast *et al.* 2007; Short Bull *et al.* 2011; Trumbo *et al.* 2013). We found that  
427 in the rural Western Slope with high hunting pressure, forests with high tree canopy cover are most  
428 important for conserving puma genetic connectivity. In contrast, in the more urbanized Front Range, non-  
429 forested habitats such as shrublands and grasslands habitats are utilized for dispersal and gene flow,  
430 effective population sizes are smaller, genetic distances among individuals are higher, and gene flow is  
431 being restricted by urbanization (Tables 2, 4, and 5). Next generation sequencing techniques can provide  
432 dense, genome-scale SNP datasets of thousands of putatively neutral markers, which gives researchers  
433 increased power to detect the often subtle effects of landscape factors, such as urbanization, on gene flow  
434 (Luikart *et al.* 2003; Lowe and Allendorf 2010; Allendorf *et al.* 2013). This is particularly important for  
435 wide-ranging species with broad geographic distributions, since landscape effects on gene flow occur at  
436 broader geographic scales and may be weaker and more difficult to detect compared to more dispersal-  
437 limited species with smaller home ranges (Holderegger *et al.* 2006; Epps *et al.* 2007; Balkenhol *et al.*  
438 2016). Indeed prior work on pumas using 16 microsatellites found no population structure across the  
439 southern Rocky Mountains of Colorado and northern New Mexico (McRae *et al.* 2005). Our results

440 demonstrate that large SNP datasets can allow researchers to identify impacts of urbanization on gene  
441 flow, effective population sizes, and patterns of population genetic structure of wide-ranging species, even  
442 before fragmentation is extensive enough to greatly reduce genetic diversity. Maintaining genetic  
443 connectivity in these “umbrella” species can have outsized benefits towards conserving biodiversity, since  
444 preserving broad swaths of contiguous habitats that are necessary for their persistence also benefits many  
445 other species with smaller home ranges and narrower habitat requirements (Sergio *et al.* 2006, 2008;  
446 Thorne *et al.* 2006).

447

#### 448 **Acknowledgements**

449 Funding was provided by the National Science Foundation, Ecology of Infectious Disease Program (NSF-  
450 EID 1413925 and 723676). Samples were collected by Colorado Parks and Wildlife. We also thank  
451 Michael Antolin, Kelly Pierce, and Jill Gerberich at Colorado State University for assistance in the lab.

452

#### 453 **References**

- 454  
455 Alexander DH, Novembre J, Lange K (2009) Fast model-based estimation of ancestry in unrelated  
456 individuals. *Genome Research*, **19**, 1655–1664.  
457 Allendorf FW, Luikart G, Aitken SN (2013) Conservation and the genetics of populations. Wiley-  
458 Blackwell, Chichester, West Sussex, United Kingdom.  
459 Balkenhol N, Cushman SA, Storfer AT, Waits LP (2016) Landscape genetics: concepts, methods,  
460 applications. Wiley-Blackwell, Chichester, West Sussex, United Kingdom.  
461 Beier P (1995) Dispersal of juvenile cougars in fragmented habitat. *Journal of Wildlife Management*, **59**,  
462 228-237.  
463 Blecha KA, Boone RB, Alldredge MW (2018) Hunger mediates apex predator's risk avoidance response  
464 in wildland–urban interface. *Journal of Animal Ecology*, **87**, 609-622.  
465 Bowcock AM, Ruiz-Linares A, Tomfohrde J, *et al.* (1994) High resolution of human evolutionary trees  
466 with polymorphic microsatellites. *Nature*, **368**, 455–457.  
467 Brown JH (1984) On the relationship between abundance and distribution of species. *American Naturalist*,  
468 **124**, 255–279.  
469 Carver S, Bevins SN, Lappin MR, *et al.* (2016) Pathogen exposure varies widely among sympatric  
470 populations of wild and domestic felids across the United States. *Ecological Applications*, **26**,  
471 367-381.  
472 Catchen JM, Hohenlohe PA, Bassham S, *et al.* (2013) Stacks: an analysis tool set for population genomics.  
473 *Molecular Ecology*, **22**, 3124–3140.

- 474 Clarke RT, Rothery P, Raybould AF (2002) Confidence limits for regression relationships between  
475 distance matrices: estimating gene flow with distance. *Journal of Agricultural Biological and*  
476 *Environmental Statistics*, **7**, 361–372.
- 477 Cohen JE (2003) Human population: the next half century. *Science*, **302**, 1172–1175.
- 478 Crooks KR (2002) Relative sensitivities of mammalian carnivores to habitat fragmentation. *Conservation*  
479 *Biology*, **16**, 488–502.
- 480 Crooks KR, Burdett CL, Theobald DM, *et al.* (2017) Quantification of habitat fragmentation reveals  
481 extinction risk in terrestrial mammals. *Proceedings of the National Academy of Sciences*, **114**,  
482 7635–7640.
- 483 Cushman SA, Gutzweiler K, Evans JS, McGarigal K (2010) The gradient paradigm: a conceptual and  
484 analytical framework for landscape ecology. In Cushman SA, Huettman F (editors) *Spatial*  
485 *complexity, informatics, and wildlife conservation*. Springer, New York, USA
- 486 Dickson BG, Jenness JS, Beier P (2005) Influence of vegetation, topography, and roads on cougar  
487 movement in southern California. *Journal of Wildlife Management*, **69**, 264–276.
- 488 Dickson BG, Roemer GW, McRae BH, Rundall JM (2013) Models of regional habitat quality and  
489 connectivity for pumas (*Puma concolor*) in the southwestern United States. *Plos One*, **8**, 1–11.
- 490 Do C, Wapels RS, Peel D *et al.* (2014) NeEstimator v2; re-implementation of software for the estimation  
491 of contemporary effective population size ( $N_e$ ) from genetic data. *Molecular Ecology Resources*,  
492 **14**, 209–214.
- 493 Dormann CF, Elith J, Bacher S, *et al.* (2012) Collinearity: a review of methods to deal with it and a  
494 simulation study evaluating their performance. *Ecography*, **36**, 27–46.
- 495 Epps CW, Wehausen JD, Bleich VC, *et al.* (2007) Optimizing dispersal and corridor models using  
496 landscape genetics. *Journal of Applied Ecology*, **44**, 714–724.
- 497 Ernest HB, Boyce WM, Bleich VC, *et al.* (2003) Genetic structure of mountain lion (*Puma concolor*)  
498 populations in California. *Genetics*, **4**, 353–366.
- 499 Ernest HB, Vickers TW, Morrison SA, *et al.* (2014) Fractured genetic connectivity threatens a southern  
500 California puma (*Puma concolor*) population. *Plos One*, **9**, 1–12.
- 501 Fountain-Jones NM, Craft ME, Funk WC, *et al.* (2017) Urban landscapes can change virus gene flow and  
502 evolution in a fragmentation-sensitive carnivore. *Molecular Ecology*, **26**, 6487–6498.
- 503 Haasl RF, Payseur BJ (2011) Multi-locus inference of population structure: a comparison between single  
504 nucleotide polymorphisms and microsatellites. *Heredity*, **106**, 158–171.
- 505 Hijmans RJ, Cameron SE, Parra JL, *et al.* (2005) Very high resolution interpolated climate surfaces for  
506 global land areas. *International Journal of Climatology*, **25**, 1965–1978
- 507 Hilty JA, Merenlender AM (2004) Use of riparian corridors and vineyards by mammalian predators in  
508 northern California. *Conservation Biology*, **18**, 126–135.
- 509 Holderegger R, Kamm U, Gugerli F (2006) Adaptive vs. neutral genetic diversity: implications for  
510 landscape genetics. *Landscape Ecology*, **21**, 797–807.
- 511 Homer C, Huang C, Yang L, *et al.* (2004) Development of a 2001 national land cover database for the  
512 United States. *Photogrammetric Engineering and Remote Sensing*, **70**, 829–840.
- 513 Hornocker M, Negri S (2009) *Cougar: ecology and conservation*. University of Chicago Press, Chicago,  
514 Illinois, USA.
- 515 Johnson WE, Onorato DP, Roelke ME, *et al.* (2010) Genetic restoration of the Florida panther. *Science*,  
516 **329**, 1641–1645.
- 517 Jombart T (2008) Adegnet: a R package for the multivariate analysis of genetic markers. *Bioinformatics*,  
518 **24**, 1403–1405.
- 519 Kalinowski ST (2005) Hp-rare 1.0: a computer program for performing rarefaction on measures of allelic  
520 richness. *Molecular Ecology Notes*, **5**, 187–189.
- 521 Legendre P, Lapointe FJ, Casgrain P (1994) Modeling brain evolution from behavior: a permutational  
522 regression approach. *Evolution*, **48**, 1487–1499.

- 523 Lewis JS, Logan KA, Alldredge MW, *et al.* (2015) The effects of urbanization on population density,  
524 occupancy, and detection probability of wild felids. *Ecological Applications*, **25**, 1880-1895.
- 525 Logan KA, Sweanor LL (2001) Desert puma: evolutionary ecology and conservation of an enduring  
526 carnivore. Island Press, Washington, DC, USA.
- 527 Lowe WH, Allendorf FW (2010) What can genetics tell us about population connectivity? *Molecular*  
528 *Ecology*, **19**, 3038-3051.
- 529 Luikart G, England PR, Tallmon D, *et al.* (2003) The power and promise of population genomics: from  
530 genotyping to genome typing. *Nature Reviews Genetics*, **4**, 981-994.
- 531 Luu K, Bazin E, Blum MGB (2016) PCAadapt: an R package to perform genome scans for selection based  
532 on principal component analysis. *Molecular Ecology Resources*, **17**, 67-77.
- 533 Magle SB, Hunt VM, Vernon M, Crooks KR (2012) Urban wildlife research: past, present, and future.  
534 *Biological Conservation*, **155**, 23-32.
- 535 Maletzke B, Kertson B, Swanson M, *et al.* (2017) Cougar response to a gradient of human development.  
536 *Ecosphere*, **8**, 1-14.
- 537 Markovchick-Nicholls L, Regan HM, Deutschman DH, *et al.* (2008) Relationships between human  
538 disturbance and wildlife land use in urban habitat fragments. *Conservation Biology*, **22**, 99-109.
- 539 Mastretta-Yanes A, Arrigo N, Alvaraz N, *et al.* (2015) Restriction site-associated DNA sequencing,  
540 genotyping error estimation and de novo assembly optimization for population genetic inference.  
541 *Molecular Ecology*, **15**, 28-41.
- 542 McKinney ML (2002) Urbanization, biodiversity, and conservation. *BioScience*, **52**, 883-890.
- 543 McMahon G, Gregonis SM, Waltman SW, *et al.* (2001) Developing a spatial framework of common  
544 ecological regions for the conterminous United States. *Environmental Management*, **28**, 293-316.
- 545 McRae BH, Beier P, Dewald LE, *et al.* (2005) Habitat barriers limit gene flow and illuminate historical  
546 events in a wide-ranging carnivore, the American puma. *Molecular Ecology*, **14**, 1965-1977.
- 547 McRae BH (2006) Isolation by resistance. *Evolution*, **60**, 1551-1561.
- 548 Moss WE, Alldredge MW, Logan KA, Pauli JN (2016a) Human expansion precipitates niche expansion  
549 for an opportunistic apex predator (*Puma concolor*). *Scientific Reports*, **6**, 1-5.
- 550 Moss WE, Alldredge MW, Pauli JN (2016b) Quantifying risk and resource use for a large carnivore in an  
551 expanding urban-wildland interface. *Journal of Applied Ecology*, **53**, 371-378.
- 552 Naiman RJ, Decamps H, Polluck M (1993) The role of riparian corridors in maintaining regional  
553 biodiversity. *Ecological Applications*, **3**, 209-212.
- 554 Newby JR, Mills LS, Ruth TK, *et al.* (2013) Human-caused mortality influences spatial population  
555 dynamics: pumas in landscapes with varying mortality risks. *Biological Conservation*, **159**, 230-  
556 239.
- 557 Paris JR, Stevens JR, Catchen JM (2017) Lost in parameter space: a road map for Stacks. *Methods in*  
558 *Ecology and Evolution*, **8**, 1360-1373.
- 559 Peterson BK, Weber JN, Kay EH, *et al.* (2012) Double digest RADseq: an inexpensive method for de  
560 novo SNP discovery and genotyping in model and nonmodel species. *PLoS One*, **7**, 1-11.
- 561 Radeloff VC, Hamer RB, Stewart SI, *et al.* (2005) The wildland-urban interface in the United States.  
562 *Ecological Applications*, **15**, 799-805.
- 563 Richards SA (2015) Likelihood and model selection. *Ecological Statistics: Contemporary Theory and*  
564 *Application*. Fox GA, Negrete-Yankelevich S, Sosa VJ. Oxford University Press, 58-80.
- 565 Riley SP, Pollinger JP, Sauvajot RM, *et al.* (2006) A southern California freeway is a physical and social  
566 barrier to gene flow in carnivores. *Molecular Ecology*, **15**, 1733-1741.
- 567 Riley SP, Serieys LEK, Pollinger JP, *et al.* (2014) Individual behavior dominates the dynamics of a  
568 mountain lion population in a highly fragmented urban landscape. *Current Biology*, **24**, 1989-  
569 1994.



- 570 Row JR, Knick ST, Oyler-McCance SJ, *et al.* (2017) Developing approaches for linear mixed modeling in  
571 landscape genetics through landscape-directed dispersal simulations. *Ecology and Evolution*, **7**,  
572 3751–3761.
- 573 Sagarin RD, Gaines SD (2002) The abundant centre distribution: to what extent is it a biogeographical  
574 rule? *Ecology Letters*, **5**, 137–147.
- 575 Sergio F, Newton I, Marchesi L, Pedrini P (2006) Ecologically justified charisma: preservation of top  
576 predators delivers biodiversity conservation. *Journal of Applied Ecology*, **43**, 1049-1055.
- 577 Sergio F, Caro T, Brown D, *et al.* (2008) Top predators as conservation tools: ecological rationale,  
578 assumptions, and efficacy. *Annual Review of Ecology, Evolution, and Systematics*, **39**, 1-19.
- 579 Shirk AJ, Landguth EL, Cushman SA (2017) A comparison of regression methods for model selection in  
580 individual-based landscape genetic analysis. *Molecular Ecology Resources*, **18**, 55-67.
- 581 Short Bull RA, Cushman SA, Mace R, *et al.* (2011) Why replication is important in landscape genetics:  
582 American black bear in the Rocky Mountains. *Molecular Ecology*, **6**, 1092-1107.
- 583 Smouse PE, Peakall R (1999) Spatial autocorrelation analysis of individual multiallele and multilocus  
584 genetic structure. *Heredity*, **82**, 561-573.
- 585 Solberg KH, Bellemain E, Drageset OM, *et al.* (2006) An evaluation of field and non-invasive genetic  
586 methods to estimate brown bear (*Ursus arctos*) population size. *Biological Conservation*, **128**,  
587 158-168.
- 588 Sweanor LL, Logan KA, Hornocker MG (2000) Cougar dispersal patterns, metapopulation dynamics, and  
589 conservation. *Conservation Biology*, **14**, 798-808.
- 590 Theobald DM (2005) Landscape patterns of exurban growth in the USA from 1980 to 2020. *Ecological*  
591 *Society*, **10**, 1–34.
- 592 Thorne JH, Cameron D, Quinn JF (2006). A conservation design for the central coast of California and the  
593 evaluation of mountain lion as an umbrella species. *Natural Areas Journal*, **26**, 137-148.
- 594 Trumbo DR, Spear SF, Baumsteiger J, Storfer A (2013) Rangewide landscape genetics of an endemic  
595 Pacific northwestern salamander. *Molecular Ecology*, **22**, 1250-1266.
- 596 U.S. Census Bureau (2017) Cumulative estimates of resident population change for the United States,  
597 regions, states, and Puerto Rico and region and state rankings: April 1, 2010 to July 1, 2017, Table  
598 2 (NST-EST2017-02). Source: U.S. Census Bureau, Population Division; Release date: December  
599 2017; [www.census.gov/programs-surveys/popest.html](http://www.census.gov/programs-surveys/popest.html).
- 600 Vandergast AG, Bohanak AJ, Weissman DB, Fisher RN (2007) Understanding the genetic effects of  
601 recent habitat fragmentation in the context of evolutionary history: phylogeography and landscape  
602 genetics of a southern California endemic Jerusalem cricket (Orthoptera: Stenopelmatidae:  
603 *Stenopelmatus*). *Molecular Ecology*, **16**, 977-992.
- 604 van Strien MJ, Keller D, Holderegger R (2012) A new analytical approach to landscape genetic modelling:  
605 least-cost transect analysis and linear mixed models. *Molecular Ecology*, **21**, 4010-4023.
- 606 Wahlund S (1928) Zusammensetzung von populationen und korrelation-serscheiunungen von standpunkt  
607 der vererbungslehre aus betrachtet. *Hereditas*, **11**, 65–106
- 608 Waples RS, England PR (2011) Estimating contemporary effective population size on the basis of linkage  
609 disequilibrium in the face of migration. *Genetics*, **189**, 633-644.
- 610 Waples RS (2016) Making sense of genetic estimates of effective population size. *Molecular Ecology*, **25**,  
611 4689-4691.
- 612 Waples RK, Larson WA, Waples RS (2016) Estimating contemporary effective population size in non-  
613 model species using linkage disequilibrium across thousands of loci. *Heredity*, **117**, 233-240.
- 614 Warren DL, Glor RE, Turelli M (2010) ENMTools: a toolbox for comparative studies of environmental  
615 niche models. *Ecography*, **33**, 607–611.
- 616 Warren MJ, Wallin DO, Beausoleil RA, Warheit KI (2016) Forest cover mediates genetic connectivity of  
617 northwestern cougars. *Conservation Genetics*, **17**, 1011-1024.

618 Wilmers CC, Wang Y, Nickel B, *et al.* (2013) Scale dependent behavioral responses to human  
619 development by a large predator, the puma. *PLoS One*, **8**, 1-11.  
620 Wright S (1942) Isolation by distance. *Genetics*, **28**, 114–138.  
621 Zeller KA, Vickers TW, Ernest HB, Boyce WM (2017) Multi-level, multi-scale resource selection  
622 functions and resistance surfaces for conservation planning: pumas as a case study. *PloS One*, **12**,  
623 1-20.

#### 624 **Author Contributions**

625 D.R.T. performed laboratory work, analyzed landscape and population genomic data, and wrote the  
626 manuscript; P.S., R.B.G., C.P.K., S.K., and N.F.J. performed laboratory work and analyzed landscape and  
627 population genomic data; K.L. and M.A. directed fieldwork and collected field data; M.E.C., S.C., H.B.E.,  
628 K.C., S.V., and W.C.F. conceived of study questions and directed research; and all authors contributed  
629 input to draft and final versions of the manuscript.  
630  
631

#### 632 **Data Accessibility**

633 ddRADseq data used in genomic analyses will be uploaded to Dryad ([datadryad.org](http://datadryad.org)) upon acceptance of  
634 the manuscript for publication.  
635

#### 636 **Supporting Information**

637  
638 **Table S1:** Library replicate analysis of error rates from different Stacks parameter settings for minimum  
639 number of identical raw reads required to create a stack (-m), number of mismatches allowed between loci  
640 when processing a single individual (-M), number of mismatches allowed between loci when building the  
641 catalog (-n), and maximum number of stacks at a single de novo locus (-max\_locus\_stacks). Locus error  
642 rate was the number of loci present in only one of the samples of a replicate pair divided by the total  
643 number of loci, allele error rate was the number of allele mismatches between replicate pairs divided by  
644 the number of loci, and SNP error rate was the proportion of SNP mismatches between replicate pairs.  
645  
646

647 **Table S2:** Landscape resistance transformations for the Western Slope and Front Range.  
648

649 **Table S3:** Correlations (Pearson's r) between environmental raster surfaces used in landscape genomic  
650 analyses for the Western Slope and Front Range regions of Colorado. Pearson's correlations > 0.7 are in  
651 bold.  
652

653 **Table S4:** Correlations (Pearson's r) between Circuitscape environmental resistances used in landscape  
654 genomic analyses for the Western Slope and Front Range regions of Colorado. Pearson's correlations >  
655 0.7 are in bold.  
656

657 **Figure S1:** Principle Components Analyses (PCAs) and Admixture plots of (a) 78 Western Slope pumas  
658 and (b) 56 Front Range pumas, analyzed separately within each region.  
659  
660

661 **Tables**

662  
663 **Table 1:** Environmental variables used for landscape genomic analyses, data sources, spatial resolution,  
664 and ecological justification.  
665

| Category   | Landscape Variable                                | Code         | Description                                                                                                                                | Data Source, Spatial Resolution                                                          | Calculation                            | Ecological Justification                                                                                                                                                                                                            |
|------------|---------------------------------------------------|--------------|--------------------------------------------------------------------------------------------------------------------------------------------|------------------------------------------------------------------------------------------|----------------------------------------|-------------------------------------------------------------------------------------------------------------------------------------------------------------------------------------------------------------------------------------|
| Distance   | Isolation by geographic distance                  | Geo. dist.   | Euclidean, straight-line distance between individuals                                                                                      | No environmental data; model assumes only distance affects gene flow, 30 meter           | ArcGIS Reclassify tool, Circuitscape   | Model of isolation by straight-line distance (Wright 1942).                                                                                                                                                                         |
| Land cover | Land cover: forested, open-natural, and developed | Land cover   | Multiple land cover categories collapsed into 3 costs of movement: forested (lowest), open natural areas (medium), and developed (highest) | National Land Cover Database (mrlc.gov/nlcd2011.php; Homer <i>et al.</i> 2011), 30 meter | ArcGIS Spatial Analyst                 | Forested habitats provide the most cover for hunting and dispersal, open natural areas are intermediate, and developed areas are the least suitable habitat for dispersal (Crooks 2002; Lewis <i>et al.</i> 2015).                  |
|            | Percent impervious surface cover                  | Imperv.      | Percentage of impervious surface                                                                                                           | National Land Cover Database (mrlc.gov/nlcd2011.php; Homer <i>et al.</i> 2011), 30 meter | ArcGIS Spatial Analyst                 | Human development results in increased noise, lights, and hunter access, limiting dispersal (Riley <i>et al.</i> 2006; Ernest <i>et al.</i> 2014; Maletzke <i>et al.</i> 2017).                                                     |
|            | Road corridors                                    | Roads        | Roads, with 50 meter buffers on each side                                                                                                  | Colorado Department of Transportation (dtdapps.coloradodot.info/otis), 30 meter          | ArcGIS Analysis Tools, Spatial Analyst | Roads increase mortality, noise, lights, and hunter access, limiting dispersal (Riley <i>et al.</i> 2006; Newby <i>et al.</i> 2013; Maletzke <i>et al.</i> 2017).                                                                   |
|            | River and stream riparian corridors               | Riparian     | River and stream riparian corridors, with 50 meter buffers on each side                                                                    | National Hydrography Dataset (nhd.usgs.gov), 30 meter                                    | ArcGIS Analysis Tools, Spatial Analyst | River and stream riparian corridors provide vegetative and topographical cover for dispersal, as well as water sources attracting prey species (Naiman <i>et al.</i> 1993; Hilty and Merenlender 2004; Dickson <i>et al.</i> 2005). |
| Vegetation | Percent tree canopy cover                         | Tree cover   | Percentage of tree canopy cover                                                                                                            | National Land Cover Database (mrlc.gov/nlcd2011.php; Homer <i>et al.</i> 2011), 30 meter | ArcGIS Spatial Analyst                 | Low tree canopy limits cover for ambush predation and concealment, and restricts dispersal (Sweanor <i>et al.</i> 2000; Logan and Sweanor 2001; Warren <i>et al.</i> 2016; Blecha <i>et al.</i> 2018).                              |
|            | Enhanced vegetation index                         | Veg. density | Density of vegetation calculated from chlorophyll reflectance in visual and near-infrared spectra                                          | Moderate Resolution Imaging Spectroradiometer (modis.gsfc.nasa.gov), 250 meter           | ArcGIS Spatial Analyst                 | Low vegetation density limits cover for ambush predation and concealment, and restricts dispersal (Sweanor <i>et al.</i> 2000; Hilty and Merenlender 2004; Warren <i>et al.</i> 2016; Blecha <i>et al.</i> 2018).                   |
| Climate    | Minimum temperature of the coldest month          | Min. temp.   | Mean annual minimum temperature of the coldest month (°C) calculated from                                                                  | Global Climate Data (worldclim.org/bioclim; Hijmans <i>et al.</i> 2005), 1 kilometer     | ArcGIS Spatial Analyst                 | Low minimum temperatures and high snowfall, found at high elevation mountain ridgelines (e.g., alpine tundra habitats) restrict                                                                                                     |



|            |                           |              |                                                                                                                           |                                                                                                                                                                                                |                                                                                                  |                                                                                                                                                                                              |
|------------|---------------------------|--------------|---------------------------------------------------------------------------------------------------------------------------|------------------------------------------------------------------------------------------------------------------------------------------------------------------------------------------------|--------------------------------------------------------------------------------------------------|----------------------------------------------------------------------------------------------------------------------------------------------------------------------------------------------|
|            |                           |              | 1970-2000 weather station data, interpolated between stations                                                             |                                                                                                                                                                                                |                                                                                                  | hunting, breeding, and dispersal (Hornocker and Negri 2009).                                                                                                                                 |
|            | Mean annual precipitation | Ann. precip. | Mean annual precipitation accumulation (mm) calculated from 1970-2000 weather station data, interpolated between stations | Global Climate Data ( <a href="http://worldclim.org/bioclim">worldclim.org/bioclim</a> ; Hijmans <i>et al.</i> 2005), 1 kilometer                                                              | ArcGIS Spatial Analyst                                                                           | Dry habitats with low precipitation accumulation limit prey species for hunting and vegetative cover, restricting dispersal (Logan and Sweanor 2001; McRae <i>et al.</i> 2005).              |
| Topography | Topographic roughness     | Topo. rough. | Topographic complexity based on variance in elevation within a moving window                                              | National Elevation Dataset ( <a href="http://Ita.cr.usgs.gov/ned">Ita.cr.usgs.gov/ned</a> ) National Map Tool ( <a href="http://viewer.nationalmap.gov">viewer.nationalmap.gov</a> ), 30 meter | Geomorphometric and Gradient Metric Toolbox (Cushman <i>et al.</i> 2010), ArcGIS Spatial Analyst | Steep, topographically-complex canyons and mountain slopes provide cover for hunting and dispersal (Dickson <i>et al.</i> 2005; Hornocker and Negri 2009).                                   |
|            | Elevation                 | Elev.        | Elevation calculated from digital elevation models.                                                                       | National Elevation Dataset ( <a href="http://Ita.cr.usgs.gov/ned">Ita.cr.usgs.gov/ned</a> ) National Map Tool ( <a href="http://viewer.nationalmap.gov">viewer.nationalmap.gov</a> ), 30 meter | ArcGIS Spatial Analyst                                                                           | Low minimum temperatures and high snowfall, found at high elevation mountain ridgelines (e.g., alpine tundra habitats) restrict hunting, breeding, and dispersal (Hornocker and Negri 2009). |

666  
667

668 **Table 2:** Study areas (km<sup>2</sup>), number of individuals genotyped (N<sub>gen</sub>), and population genomic parameter  
 669 estimates from the Western Slope and Front Range of Colorado. Population genomic measures are  
 670 observed heterozygosity (H<sub>obs</sub>), expected heterozygosity (H<sub>exp</sub>), nucleotide diversity ( $\pi$ ), allelic richness  
 671 (A<sub>r</sub>), inbreeding coefficient (F<sub>IS</sub>), genetic differentiation among populations (pairwise F<sub>ST</sub>), mean genetic  
 672 distance among individuals corrected for geographic distance (D<sub>PS</sub> and r per km) with standard errors  
 673 (S.E.), and effective population size (N<sub>e</sub>) with 95% confidence intervals (C.I.) based on parametric  
 674 bootstrapping.  
 675

| Region        | Area (km <sup>2</sup> ) | N <sub>gen</sub> | H <sub>obs</sub> | H <sub>exp</sub> | $\pi$  | A <sub>r</sub> | F <sub>IS</sub> | F <sub>ST</sub> | D <sub>PS</sub> /km (S.E.) | r/km (S.E.) | N <sub>e</sub> (95% C.I.) |
|---------------|-------------------------|------------------|------------------|------------------|--------|----------------|-----------------|-----------------|----------------------------|-------------|---------------------------|
| Western Slope | 11889                   | 78 indiv.        | 0.240            | 0.272            | 0.0029 | 1.93           | 0.117           | 0.024           | 0.28 (0.05)                | 0.15 (0.03) | 69.3 (66.2-72.4)          |
| Front Range   | 11958                   | 56 indiv.        | 0.242            | 0.263            | 0.0028 | 1.89           | 0.084           |                 | 0.46 (0.16)                | 0.24 (0.09) | 40.2 (38.7-41.7)          |

676  
 677

678 **Table 3:** Habitat differences between the Western Slope and Front Range of Colorado. Units are percent  
 679 cover for impervious surface and tree canopy cover; resistance values for land cover, river and stream  
 680 riparian corridors, and roads; degrees Celsius for temperature; millimeters for precipitation; meters for  
 681 elevation; and unitless measurements based on chlorophyll reflectance and variance in elevation,  
 682 respectively, for enhanced vegetation index and topographic roughness.  
 683

| Landscape Data                   | Western Slope |         |        |        |         | Front Range |         |        |        |         |
|----------------------------------|---------------|---------|--------|--------|---------|-------------|---------|--------|--------|---------|
|                                  | Min           | Max     | Median | Mean   | Std Dev | Min         | Max     | Median | Mean   | Std Dev |
| Elevation (m)                    | 1453.5        | 4362.9  | 2354   | 2418.0 | 552.5   | 1474.5      | 4347.1  | 2365   | 2374.9 | 629.3   |
| Tree canopy cover (%)            | 0             | 100     | 20     | 29.9   | 31.4    | 0           | 100     | 32     | 35.0   | 33.6    |
| Impervious surface (%)           | 0             | 100     | 0      | 0.5    | 4.1     | 0           | 100     | 0      | 4.0    | 13.5    |
| Minimum temp. coldest month (°C) | -20.2         | -9.5    | -13.3  | -13.9  | 2.8     | -19.9       | -8.3    | -12.7  | -12.6  | 2.8     |
| Annual precipitation (mm)        | 208           | 1137    | 458    | 483.3  | 171.5   | 359         | 1006    | 452    | 496.4  | 121.9   |
| Enhanced vegetation index        | -1806         | 8955    | 4634   | 4434.9 | 1858.3  | -1969       | 9132    | 5416   | 4957.8 | 1800.9  |
| Topographic roughness            | 0             | 27924.6 | 11     | 53.1   | 129.6   | 0           | 20067.0 | 25     | 56.2   | 100.8   |
| Landcover                        | 1             | 10      | 1      | 3.2    | 3.0     | 1           | 10      | 1      | 4.2    | 3.7     |
| Roads                            | 1             | 10      | 1      | 1.7    | 2.5     | 1           | 10      | 1      | 2.7    | 3.6     |
| Riparian                         | 1             | 10      | 10     | 9.4    | 2.3     | 1           | 10      | 10     | 9.4    | 2.3     |

684  
 685

686 **Table 4:** Multiple regression on distance matrices (MRDM) landscape genomic results from the Western  
687 Slope and Front Range of Colorado. Response variables were individual-based genetic distances, i.e.,  
688 proportion of shared alleles (Dps) and relatedness (r). Explanatory variables, after removing correlated  
689 variables, were the geographic (Euclidean) distance model (geo. dist.), percent impervious surface cover,  
690 percent tree canopy cover, river and stream riparian corridors, roads, and minimum temperature of the  
691 coldest month. Forward selection followed by backward elimination was performed, with 1,000 random  
692 permutations of the dependent distance matrix per step, using Bonferroni-corrected p-to-enter and p-to-  
693 remove alpha values of 0.05. Standardized beta coefficients were used to assess the direction of effect of  
694 each landscape variable on gene flow. Only univariate models were supported.  
695

| Region        | Genetic distance | Landscape factors | Direction of effect | r <sup>2</sup> | p     |
|---------------|------------------|-------------------|---------------------|----------------|-------|
| Western Slope | Dps              | tree cover        | +                   | 0.08           | 0.001 |
|               | r                | geo. dist.        | -                   | 0.04           | 0.001 |
| Front Range   | Dps              | geo. dist.        | -                   | 0.05           | 0.001 |
|               | r                | geo. dist.        | -                   | 0.04           | 0.001 |

696  
697

698 **Table 5:** Maximum likelihood of population effects (MLPE) landscape genomic results from the Western  
 699 Slope and Front Range of Colorado. Response variables were individual-based genetic distances, i.e.,  
 700 proportion of shared alleles (Dps) and relatedness (r). Pairwise comparisons of individuals were controlled  
 701 as a random effect. Fixed effects, after removing correlated variables, were the geographic (Euclidean)  
 702 distance model (geo. dist.), percent impervious surface cover, percent tree canopy cover, vegetation  
 703 density, river and stream riparian corridors, roads, and minimum temperature of the coldest month.  
 704 Standardized beta coefficients were used to assess the direction of effect of each landscape variable on  
 705 gene flow. Models reported are within the top 5 BIC units. Landscape factors are in order of standardized  
 706 beta coefficients (largest to smallest).  
 707

| Region        | Genetic distance | Landscape factors  | Direction of effect | r <sup>2</sup> | ΔBIC |
|---------------|------------------|--------------------|---------------------|----------------|------|
| Western Slope | Dps              | tree cover         | +                   | 0.15           | 0    |
|               |                  | min. temperature   | -                   |                |      |
|               |                  | tree cover         | +                   | 0.15           | 0.6  |
|               |                  | geo. dist.         | -                   |                |      |
|               | r                | tree cover         | +                   | 0.14           | 3.0  |
|               |                  | geo. dist.         | -                   | 0.17           | 0    |
|               |                  | tree cover         | +                   |                |      |
|               |                  | geo. dist.         | -                   | 0.17           | 3.8  |
| Front Range   | Dps              | geo. dist.         | -                   | 0.12           | 0    |
|               |                  | tree cover         | -                   |                |      |
|               |                  | impervious surface | -                   |                |      |
|               |                  | geo. dist.         | -                   | 0.11           | 2.9  |
|               | r                | tree cover         | -                   |                |      |
|               |                  | geo. dist.         | -                   | 0.13           | 0    |
|               |                  | tree cover         | -                   |                |      |
|               |                  | impervious surface | -                   |                |      |
|               |                  | geo. dist.         | -                   | 0.13           | 0.5  |
|               |                  | tree cover         | -                   |                |      |

708  
 709



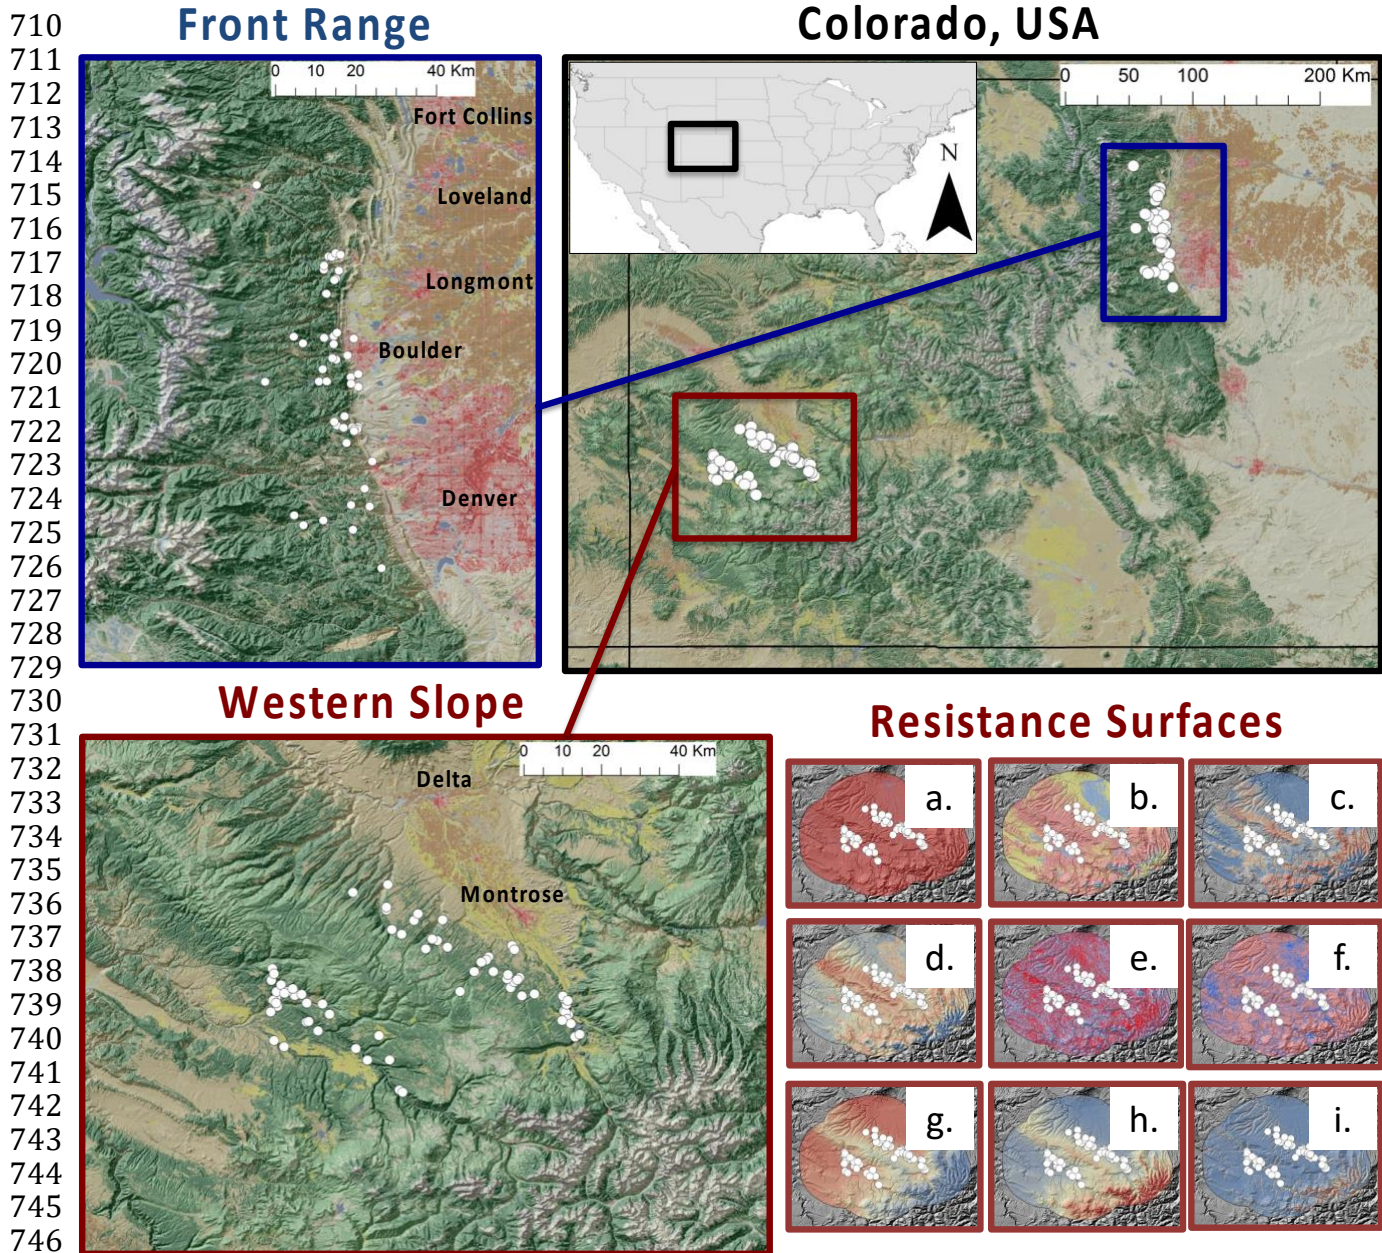

**Figure 1:** Study area in the Western Slope and Front Range of the southern Rocky Mountains of Colorado, USA. Landscape genomic analyses included 78 pumas from the Western Slope and 56 pumas from the Front Range (white circles). Resistance surfaces, shown for the Western Slope, represent alternative hypotheses of the effects of landscape variables on puma dispersal and gene flow (red=high gene flow, blue=low gene flow) for: (a) percent impervious surface cover (negative effect on gene flow), (b) land cover (forested, open-natural, and developed: positive, neutral, and negative effects on gene flow), (c) percent tree canopy cover (positive effect), (d) vegetation density (positive effect), (e) river and stream riparian corridors (positive effect), (f) roads (negative effect), (g) minimum temperature of the coldest month (negative effect), (h) annual precipitation (positive effect), and (i) topographic roughness (positive effect). We also tested isolation by geographic Euclidean distance. Land cover base maps show forests (green), shrub and grasslands (tan), urban areas (red), agriculture and ranchlands (brown and yellow), and alpine tundra (grey).

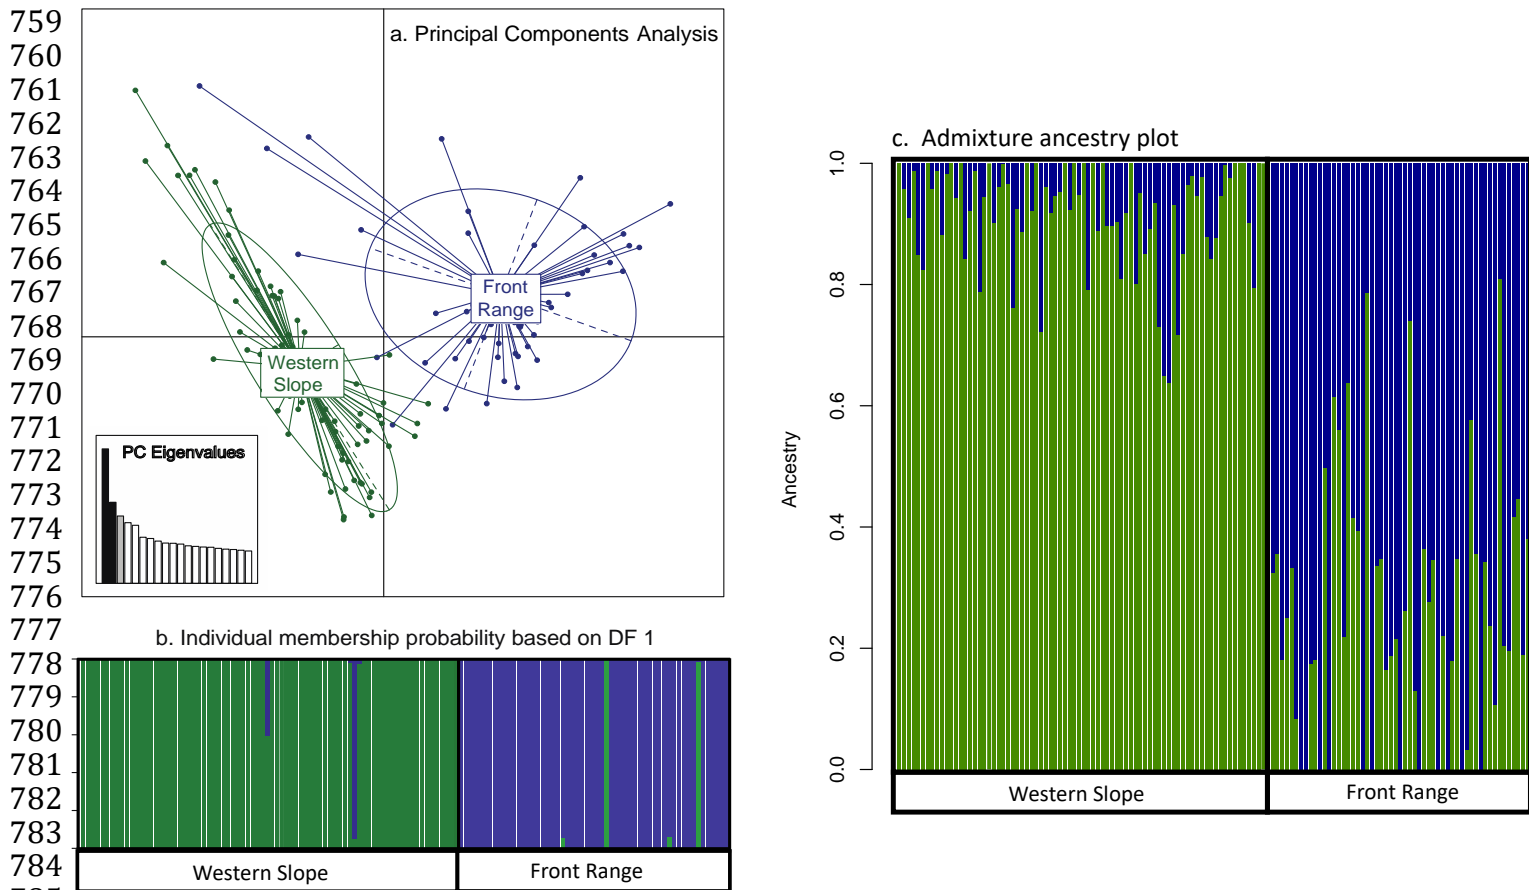

**Figure 2:** Population structure from (a) Principal Components Analysis (PCA), (b) Discriminant Analysis of Principal Components (DAPC), and (c) Admixture analysis. Individuals assigned to the Western Slope and Front Range are green and blue, respectively. K=2 was most supported in Admixture analysis using cross validation error.
